# Supplementary material
Source: Springer Nature journal article supplement (https://www.springermedizin.de/resource/supplementary/13075_2004_1205_MOESM6_ESM.pdf/9689218)

◆ Ab in MMC+    ■ Ab in MMC-    ▲ Ab+TCL in MMC+    ● Ab+TCL in MMC-

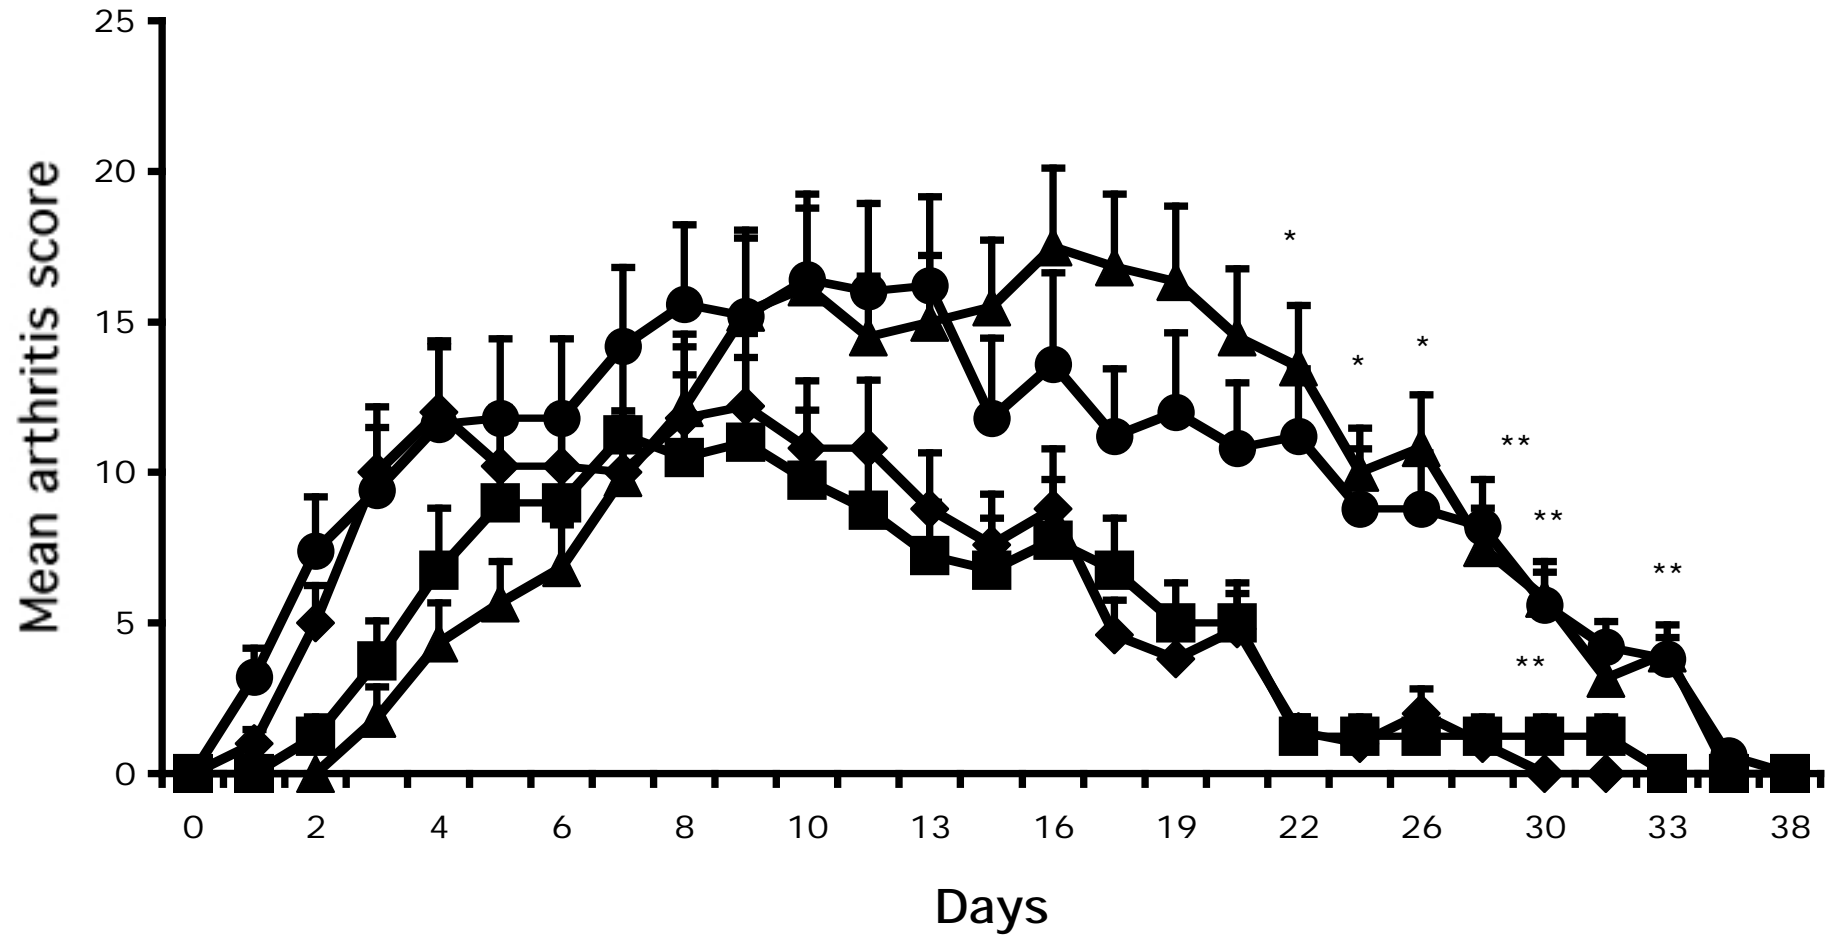

Supplement: MOESM6 [file 9689218]
